# Supplementary material for: Clinical diagnostic model for sciatica developed in primary care patients with low back-related leg pain
Source: PLoS One. 2018 Apr 5;13(4):e0191852. doi: 10.1371/journal.pone.0191852 (PMC5886387; doi:10.1371/journal.pone.0191852)
Supplement: S1 Dataset — (XLSX) [file pone.0191852.s002.xlsx]

## Sheet: Dataset
Number	Age	Gender	RMDQ (0-23)	Nerve root compression on MRI	Confidence in diagnosis (0-100%)	Clinician diagnosis sciatica (1=yes)	Back pain intensity (0-10)	Leg pain Intensity (0-10)	BMI	Self-certified time of work because of current episode of back/leg pain	Given Sick/Fit Notes from doctor because of current bout/episode of back/leg pain	Leg pain worse	Cough/sneeze positive	Subjective sensory changes	Below knee pain	Neural tension (yes=1)	Neurological deficit (myotome, reflex or sensory) yes=1	Myotome defcit	Sensation deficit	reflex deficit	SLR positive	Crossed SLR positive	Femoral nerve stretch positive	Slump positive	Back pain duration	Leg pain duration	Comorbidities	General health
1	59.65	F	22	1	100	1	6.33	7.33	34.38			1	1	1	1	1	1	0	1	0	1	0	0	0	1	2	1	2
2	58.51	M	13	1	80	1	2.33	4.67	25.78	0	0	1	0	1	1	1	0	0	0	0	1	0	0	0	2	2	1	1
3	30.33	F	3	0	80	0	6	4.33	27.97			0	0	0	1	0	0	0	0	0	0	0	0	0	2	2	0	1
4	45.92	F	23	0	80	0	7	7	33.61			0	0	1	1	0	0	0	0	0	0	0	0	0	2	2	2	2
5	45.08	M	19	1	80	1	5	7.33	30.64	1	1	1	0	1	1	0	1	1	1	0	0	0	0	0	1	0	0	1
6	69.61	F	9	0	90	1	5	5	25.53			1	0	1	1	1	1	1	0	0	1	0	0	0	2	2	1	1
7	26.68	M	15	1	95	1	4	4.33	26.84	1	0	1	1	0	1	1	1	0	1	1	1	0	0	1	0	0	0	1
8	41.92	F	10	1	85	1	4.33	3	28.38	0	0	1	0	1	1	1	1	0	1	1	1	0	0	0	2	2	1	1
9	25.09	F	10	0	85	1	3.67	5	27.81			0	0	1	1	1	1	0	1	0	1	0	0	0	0	0	0	2
10	45.84	F	6	0	85	0	6.67	2.33	24.12	0	0	0	0	1	0	0	0	0	0	0	0	0	0	0	2	2	0	1
11	59.96	F	7	1	85	1	2.33	3.33	24.16			1	0	1	1	1	1	0	1	0	1	0	0	0	0	0	2	1
12	57.65	M	22	1	80	0	9	5.33	34.64			0	0	1	0	0	0	0	0	0	0	0	0	0	0	0	1	1
13	44.04	F	16	1	85	1	3	3.67	23.61	1	1	1	0	1	1	1	1	0	1	1	1	0	0	1	1	1	0	1
14	63.21	F	11	1	80	1	6.67	5	31.7	0	0	1	1	1	1	1	1	0	1	0	1	0	0	0	1	1	1	1
15	28.18	M	17	1	80	1	5.33	5.33	33.27	1	0	1	1	1	1	1	1	0	1	0	1	0	0	1	1	1	0	1
16	55.7	F	7	1	85	1	3	5	31.53	0	0	1	0	1	0	0	1	1	0	0	0	0	0	0	0		0	1
17	41.88	F	23	1	80	1	7.67	8	38.43			0	0	1	1	1	1	0	1	0	1	0	0	1	2	2	1	2
18	37.75	F	1	0	85	1	5.67	4.33	27.33	0	0	0	0	1	0	1	0	0	0	0	1	0	0	0	1	1	0	1
19	71.35	M	14	1	85	1	7.33	6	20.98			0	0	1	1	0	1	1	1	1	0	0	0	0	2	2	1	1
20	67.67	F	12	1	85	0	3	4.33	30.12			1	0	0	0	0	0	0	0	0	0	0	0	0	2	2	0	1
21	71.94	F	18	1	90	1	2.33	1.33	30.47			0	0	1	1	0	1	1	1	1	0	0	0	0	0	0	1	1
22	74.25	M	13	1	95	1	7.33	8	27.53			1	1	1	1	1	1	1	1	0	1	1	0	0	0	0	0	1
23	46.3	M	14	1	95	1	7	7	32.2	0	0	1	1	1	1	1	1	0	1	1	1	0	0	0	2	0	0	1
24	28.5	F	4	0	100	1	5.67	6.33	28.58	1	1	0	0	1	1	1	1	1	1	0	1	0	1	0	1	1	0	1
25	46.88	M	5	0	90	0	2.67	1.67	22.39	1	1	0	0	0	0	0	0	0	0	0	0	0	0	0	1	1	0	1
26	59.43	F	16	1	80	1	5	3.5	32.95	0	1	1	0	1	0	1	1	1	1	0	0	0	0	1	0	0	1	2
27	54.03	F	9	1	80	1	5.33	4.33	31.21	0	0	1	1	1	1	1	1	0	1	0	1	0	0	0	0	0	0	1
28	47.07	F	5	0	80	0	5.67	3.67	29.34	0	0	0	0	0	1	0	0	0	0	0	0	0	0	0	0	0	2	3
29	20.5	F	20	0	95	1	5.67	3	23.79			0	0	1	1	1	1	1	1	1	1	0	0	0	1	1	0	1
30	55.17	F	10	1	85	1	5.33	4.33	26.85	0	0	1	0	1	1	0	1	0	0	1	0	0	0	0	1	1	0	1
31	66.24	M	10	1	90	1	4	4	31.4	0	0	1	0	0	1	1	1	1	0	1	1	0	0	0	0	0	1	1
32	65.6	M	2	1	80	1	1.33	1	26.99			1	0	1	1	0	0	0	0	0	0	0	0	0	0	0	0	1
33	29.84	M	16	1	95	1	6.33	8.67	35.09			1	1	1	1	1	1	1	1	0	1	0	0	0	2	1	0	1
34	60.87	F	9	0	80	1	8.33	4.67	20.74	0	0	1	0	1	0	1	1	0	1	0	0	0	1	0	0	0	0	1
35	58.79	M	18	1	85	1	4	4	27.43	0	1	1	0	1	1	0	1	0	1	0	0	0	0	0	1	1	0	1
36	76.35	F	8	1	85	1	6.67	6.33	27.94			0	0	0	1	0	1	0	0	1	0	0	0	0	2	2	2	1
37	38.73	M	12	1	80	1	2.33	2.33	25.22		0	0	1	1	0	1	0	0	0	0	0	0	0	1	0	1	0	2
38	22.02	M	4	1	85	1	2	2	30.91	1	0	1	0	0	1	1	0	0	0	0	1	0	0	0	1	1	0	1
39	25.73	F	12	0	90	0	4	3	30.86			0	0	0	0	0	0	0	0	0	0	0	0	0	2	2	0	1
40	29.9	F	9	0	80	1	3.67	2.67	35.79	0	0	0	0	0	1	1	1	0	1	0	1	0	0	0	0	0	1	1
41	41.41	M	20	1	90	1	7	7.33	43.4	0	0	0	1	1	1	1	1	1	1	0	1	0	0	1	2	0	1	2
42	27.63	F	11	0	80	1	6	3.33	26.96	0	1	1	0	0	1	1	1	1	1	0	1	0	0	1	2	0	1	1
43	54.43	F	7	1	80	1	6	7.33	19.97	0	1	1	1	0	1	1	1	0	1		1	0	0	0	2	0	0	1
44	47.79	M	2	1	85	1	0.33	3.67	26.91	0	0	1	1	1	1	1	1	0	1	0	1	0	0	1	2	0	0	1
45	55.47	F	15	0	80	1	7.67	8.33	30.36	0	0	0	0	0	1	1	0	0	0	0	0	0	1	0	2	2	1	1
46	64.47	F	10	1	80	1	4.67	6.67	46.3			1	0	0	1	1	0	0	0	0	1	0	0	0	0	0	1	1
47	44.33	F	16	1	90	1	7.33	7.67	34.73	1	1	1	0	0	1	1	1	1	1	1	1	0	0	1	0	0	0	1
48	50.84	F	15	0	80	1	4.33	7	22.81	0	0	1	0	1	1	1	1	0	0	1	1	0	0	0	2		2	1
49	53.29	F	17	1	80	1	5.67	6	38.28	0	0	1	0	0	0	1	1	1	1	0	0	0	1	0	2	2	0	1
50	55.55	M	0	1	90	1	5	1.67	34.06	0	0	0	0	1	1	0	1	0	1	0	0	0	0	0	1	1	1	1
51	38.12	F	21	1	90	1	9.67	9.67	34.36	1	0	1	1	1	1	1	1	0	0	1	1	0	0	0	2	0	1	1
52	46.9	F	10	0	80	0	3	1.67	25.09	1	1	0	0	1	0	0	0	0	0	0	0	0	0	0	0	0	0	2
53	36.34	F	15	1	90	1	6	9.33	24.16			1	1	1	1	1	1	1	1	1	1	0	0	0	1	0	0	1
54	67.27	M	16	0	90	1	9	7.33	28.39			1	0	1	1	1	1	0	0	1	1	0	0	0	2	1	1	1
55	44.32	F	15	1	100	1	6.67	8	28.98	1	1	1	1	0	1	1	0	0	0	0	1	0	0	0	0	0	0	1
56	64.54	M	11	1	100	1	5	6.33	27.65			1	0	0	1	1	1	0	1	0	1	1	0	0	1	1	1	1
57	48.4	F	20	0	90	1	5.33	4.67	26.71			1	0	1	1	1	1	1	0	0	1	0	1	0	0	0	0	1
58	50.69	M	17	0	80	1	6.67	8	28.08			1	0	1	1	0	1	1	0	1	0	0	0	0	2	2	1	2
59	62.64	M	6	1	80	0	8	2.33	27.7	0	0	0	0	0	0	0	0	0	0	0	0	0	0	0	2	2	0	1
60	66.74	F	9	0	95	1	5.67	6	31.68			0	0	0	1	1	1	1	0	0	1	0	0	0	0	0	0	1
61	47.12	M	12	0	80	0	5.33	5	22.95	0	1	0	0	0	0	0	0	0	0	0	0	0	0	0	0	0	0	2
62	37.68	F	19	1	85	1	5.33	6	28.88	0	0	1	1	0	1	1	1	0	1	0	1	0	0	0	0	0	0	1
63	49.24	F	10	0	95	0	5	0.67	32.52	1	1	0	0	0	0	0	0	0	0	0	0	0	0	0	2	0	0	1
64	37.32	M	9	1	100	1	1.33	7.33	33.3	0	0	1	1	1	1	1	1	0	0	1	1	0	0	0	0	1	0	2
65	36.08	F	19	0	85	1	6.67	4.67	26.31	1	0	0	1	1	1	1	1	1	0	0	1	0	0	0	0	0	0	1
66	55.46	F	17	0	85	0	7	9.33	34.69	0	0	0	0	0	0	0	0	0	0	0	0	0	0	0	2	2	0	1
67	57.3	F	21	0	85	0	7.67	7	24.62			0	0	0	0	1	0	0	0	0	1	0	0	0	2	2	0	1
68	47.26	F	11	1	100	1	6	6.67	26.89	0	0	1	1	1	1	1	1	0	1	1	1	1	0	0	1	0	0	2
69	56.65	F	15	1	85	1	3.33	7	31.25	0	1	1	1	1	1	1	1	0	1	1	1	0	0	0	0	0	2	1
70	53.79	F	9	1	80	0	5.33	3.33	24			0	0	0	0	0	0	0	0	0	0	0	0	0	2	0	1	1
71	50.35	F	18	0	85	0	6.67	5	27.96			0	0	1	0	0	0	0	0	0	0	0	0	0	2	2	0	2
72	61.65	F	17	1	100	1	10	10	29.9			0	0	1	1	1	1	1	1	0	1	0	0	0	0	0	1	1
73	55.46	M	13	1	90	1	7	7	31.07	0	0	1	0	1	1	0	1	1	1	1	0	0	0	0	2		0	1
74	55.07	M	18	1	95	1	4	6	25.33	1	1	1	0	0	1	1	1	0	0	1	1	0	0	0	0	0	0	1
75	39.13	F	18	0	80	1	6.33	3	32.44	1	1	0	0	1	1	0	0	0	0	0	0	0	0	0	1	1	0	1
76	44.73	F	10	0	80	1	5	6	26.56	0	0	1	0	1	1	0	0	0	0	0	0	0	0	0	2	2	0	1
77	32.07	F	15	1	80	1	5.33	2	34.84	0	0	0	0	1	1	1	0	0	0	0	1	0	0	0	2	2	0	1
78	62.44	M	14	0	80	0	3	2.33	28.4	0	0	0	0	1	0	0	0	0	0	0	0	0	0	0	1	0	1	1
79	58.29	F	16	1	100	1	9.67	9.33	32.81	0	1	1	0	1	1	1	1	1	1	1	1	0	1	0	0	0	1	1
80	59.29	M	14	1	100	1	9	9.33	22.38	0	0	0	0	1	1	1	1	1	0	1	0	0	1	0	1	1	0	1
81	36.05	M	13	1	95	1	10	10	26.19	0	0	1	1	0	1	1	1	0	0	1	1	0	0	0	2	0	0	1
82	61.47	F	4	0	80	0	5	6	28.71			1	0	0	1	0	1	0	1	0	0	0	0	0	0	0	2	1
83	44.66	F	19	1	100	1	1.33	5.33	29.62	0	0	1	1	0	1	1	1	1	0	1	1	0	0	0	1	0	0	1
84	62.29	M	18	1	95	1	9	9	36.11	0	0	1	1	1	1	1	1	1	1	0	1	1	0	0	1	1	1	2
85	30.09	F	11	0	80	0	8	2.67	21.64			0	0	0	0	0	0	0	0	0	0	0	0	0	2	0	0	1
86	24.63	F	17	1	80	1	8	6	37.34			0	0	1	1	0	1	0	1	0	0	0	0	0	2	2	2	1
87	51.2	F	8	0	90	1	10	10	27.22	0	0	1	1	1	1	1	1	1	0	0	1	0	1	0	2	1	1	1
88	60.19	F	11	1	90	1	8	8	38.49	0	0	1	1	1	1	1	1	1	0	0	1	0	0	0	0	0	1	2
89	47.82	M	14	1	90	1	3	5	39.04	1	0	1	0	1	1	1	1	1	0	0	1	0	0	0	0	0	2	1
90	31.22	F	12	0	90	0	4.67	2	38.18	0	0	0	0	1	0	0	0	0	0	0	0	0	0	0	1	1	0	1
91	42.13	F	21	1	100	1	6	9.67	30.59	1	0	1	1	1	1	1	1	0	0	1	1	1	0	0	2	2	0	1
92	29.04	M	7	1	80	1	1.33	4.67	35.13			1	0	0	1	1	1	0	0	1	1	0	0	0	1	0	0	1
93	40.22	M	14	1	100	1	4.33	6.67	32.67	0	0	1	0	1	1	1	0	0	0	0	1	1	0	0	0	0	0	1
94	63.32	F	16	1	90	1	10	10	26.29			1	1	1	1	1	1	1	1	0	1	0	0	1	1	1	0	1
95	49.73	M	5	1	80	0	3.67	2.33	27.29	0	0	0	0	1	1	0	1	0	1	0	0	0	0	0	1	1	0	1
96	33.31	M	12	1	85	1	7	6.67	28.17	0	0	1	0	0	1	1	0	0	0	0	1	0	0	1	1	1	0	1
97	51.69	F	9	1	95	1	6	6	36.3			1	1	1	1	1	1	0	1	1	1	1	0	0	1	1	0	1
98	38.62	F	21	1	85	1	8.67	8	45.38	1	1	0	1	0	1	1	0	0	0	0	1	0	0	0	0	0	0	1
99	55.64	M	10	1	85	1	6.33	6.33	25.59			0	0	1	1	1	1	0	1	0	1	0	0	0	0	0	0	1
100	54.21	M	7	1	80	1	4	4	27	0	0	1	0	1	1	0	1	1	0	0	0	0	0	0	2	0	0	1
101	40.31	F	16	0	85	0	6	2.33	29.17	1	1	0	0	0	0	0	0	0	0	0	0	0	0	0	0	0	0	1
102	73.07	F	16	1	90	0	4	3	32.42			0	0	0	0	0	0	0	0	0	0	0	0	0	0	0	2	1
103	44.24	F	19	1	90	1	6	7	26.53	0	0	1	0	1	1	1	1	1	1	0	1	0	0	1	1	1	0	1
104	58.97	M	13	1	80	1	4.33	4.33	29	0	0	0	0	1	1	0	1	0	1	0	0	0	0	0	2	1	2	2
105	60.85	M	8	1	95	1	4.67	5.33	30.87	0	0	1	0	0	1	1	1	0	1	0	1	0	0	1	0	0	0	1
106	48.69	F	11	1	95	1	5.33	2	29.26	1	0	0	0	0	0	1	1	1	1	1	1	0	0	0	0	0	0	1
107	50.17	F	21	1	90	1	7	9	33.89			1	1	1	1	1	1	0	0	1	1	0	0	0	0	0	1	1
108	65.42	F	13	0	90	1	5.67	6	35.45	0	0	1	0	0	1	1	1	0	1	0	1	0	0	0	1	1	1	1
109	48.63	F	13	0	80	0	6.67	1.67	26.87	1	1	0	0	0	0	0	0	0	0		0	0	0	0	0	0	0	1
110	50.59	F	13	1	95	1	4	7.67	24.54	1	1	1	0	1	1	1	1	1	0	0	1	0	0	1	0	0	0	1
111	38.11	F	22	1	85	0	9	3.33	34.88			0	0	1	0	0	0	0	0	0	0	0	0	0	1	0	0	1
112	33.46	M	5	1	85	1	4.67	3.67	24.86	1	0	0	0	1	1	0	1	1	1	0	0	0	0	0	0	0	0	1
113	37.34	F	14	0	80	1	7.33	4.67	25.1	0	0	0	1	1	1	1	1	1	1	0	1	0	0	0	1	1	0	1
114	31.78	M	22	1	100	1	8.67	9	30.13			1	1	1	1	1	1	1	1	1	1	1	0	0	0	0	0	1
115	45.86	M	10	1	100	1	6.33	7	24.49	0	0	1	1	1	1	1	1	0	1	0	1	1	0	0	1	1	0	1
116	51.15	M	22	1	100	1	9	9	23.75	0	1	1	1	0	1	1	1	1	1	1	1	0	0	0	2	2	0	2
117	49.64	M	9	1	90	1	1.67	7	20.97	1	1	1	1	1	1	1	1	1	1	0	1	0	0	0	1	0	0	1
118	59.57	M	14	0	80	0	4.67	4.67	26.05			1	1	1	1	1	0	0	0	0	1	0	0	0	2	2	2	2
119	39.99	M	23	1	80	1	8.33	8.33	23.67			1	0	1	1	0	1	0	1	0	0	0	0	0	2	2	0	2
120	18.77	F	21	0	85	1	5	4	22.5			1	0	0	0	1	1	1	0	0	1	0	0	1	2		0	1
121	28.06	M	15	0	80	1	5.33	1	29.43	1	1	0	0	1	1	1	0	0	0	0	1	0	0	0	2		0	1
122	79.17	F	5	0	80	1	1.33	2	32.42			0	0	1	1	0	0	0	0	0	0	0	0	0	2	0	0	2
123	30.34	F	8	0	85	0	5.33	3.67	22.31	1	0	0	0	0	0	0	0	0	0	0	0	0	0	0	2	2	0	1
124	61.79	F	8	0	85	1	4.67	4.67	23.05	1	1	0	0	1	1	1	1	1	1	0	1	0	0	0	1	2	0	1
125	48.94	F	11	1	90	1	5.67	8	26.09	0	0	1	1	1	1	1	0	0	0	0	1	0	0	0	0		0	1
126	44.07	F	5	0	80	1	6.67	4	30.86	0	0	0	0	0	1	0	1	0	1	0	0	0	0	0	2	2	0	1
127	31.16	M	9	1	85	0	1.67	3.67	25.76	1	0	0	0	0	0	0	0	0	0	0	0	0	0	0	1	1	0	1
128	71.58	F	3	0	80	1	7	7	26.38			1	0	0	1	0	0	0	0	0	0	0	0	0	2	0	0	1
129	51.58	M	10	1	80	1	5	3.33	31.73	0	1	1	0	0	1	0	1	1	1	0	0	0	0	0	0	0	2	1
130	41.88	F	22	1	80	1	10	6	23.95			1	0	0	1	1	0	0	0	0	1	0	0	0	1	1	0	1
131	43.44	F	21	0	80	1	6	6	24.57	0	1	0	0	1	1	1	1	0	1	0	1	0	0	0	0	0	0	1
132	73.67	F	21	0	80	1	5	4.33	26.04			0	0	0	0	0	0	0	0	0	0	0	0	0	0	0	2	1
133	34.64	M	18	1	95	1	9.67	9.67	30.1	0	1	1	1	1	1	1	1	1	1	1	1	0	0	1	2	2	0	1
134	45.28	M	13	1	85	1	6	7.33	29.16			0	0	1	1	1	0	0	0	0	1	0	0	0	2	2	1	2
135	68.29	M	17	0	80	1	7.67	5.67	33.88			0	0	0	1	1	1	1	1	0	1	0	0	1	2	2	1	2
136	28.79	F	13	0	80	0	8.33	6.67	22.08	1	0	0	0	1	1	1	0	0	0	0	1	0	0	0	2	2	1	1
137	73.14	F	22	1	80	1	6.67	7.67	39.84			1	0	1	1	1	1	1	0	1	1	0	0	0	0	0	0	2
138	53.4	M	19	1	90	1	6.33	6.33	27.73	0	0	1	1	0	1	1	0	0	0	0	1	0	0	0	0	0	0	1
139	55.74	F	14	1	85	1	6.67	6.67	30.53			1	0	0	1	1	1	0	0	1	1	0	0	0	2	2	0	2
140	42.55	F	10	0	80	0	5.33	3	28.73	0	0	0	0	1	1	0	0	0	0	0	0	0	0	0	2	2	0	1
141	57.25	F	19	0	85	0	8.33	8.33	42.42			0	0	1	0	0	0		0	0	0	0	0	0	0	2	2	2
142	62.73	M	14	1	80	0	6.33	4.33	26.12	1	0	0	0	1	1	0	1	0	0	1	0	0	0	0	2	0	0	1
143	46.08	F	16	0	80	0	2.33	0	38.46			0	0	0	0	1	1	0	1	1	1	0	0	1	1		1	1
144	43.24	M	17	0	80	0	4	2.67	22.63	0	1	0	0	0	1	0	0	0	0	0	0	0	0	0	0	0	0	1
145	44.71	M	21	1	100	1	10	10	27.03	0	0	1	1	1	1	1	1	1	1	1	1	0	0	0	2	2	0	1
146	36.9	F	8	1	100	1	7	7	32.81	0	0	1	1	1	1	1	1	1	1	1	1	1	0	0	1	1	0	1
147	69.52	M	12	1	90	1	6	4.33	29.37			0	0	1	1	1	1	0	1	0	0	0	1	0	2	0	1	1
148	41.53	F	17	0	80	0	6	5	34.92			0	0	1	0	0	1	0	1	0	0	0	0	0	1	1	1	1
149	58.38	M	18	1	80	1	6	5.67	26.65			0	0	1	0	0	1	0	1	1	0	0	0	0	0	0	2	1
150	60.79	F	12	0	90	1	5.67	5.67	27.25			1	0	1	1	1	1	0	1	1	1	0	0	1	2	2	0	2
151	58.31	M	9	0	90	0	3	2				1	0	0	0	0	0	0	0	0	0	0	0	0	1	0	0	1
152	41.75	F	11	0	100	0	6.67	2.33	22.27	0	0	0	0	0	0	0	0	0	0	0	0	0	0	0	2	2	0	1
153	49.07	F	17	1	90	1	5.33	6.33	32.24	1	0	1	0	0	1	1	0	0	0	0	1	0	0	0	2	2	0	1
154	34.04	F	9	0	95	1	5.33	5.33	20.73	0	0	1	0	1	1	1	1	0	1	0	1	0	0	1	1	0	0	1
155	50.06	M	11	0	100	0	4.67	1.33	27.38	1	0	0	0	0	0	0	0	0	0	0	0	0	0	0	0	0	0	1
156	34.13	M	22	0	90	1	7.33	5	25.77	0	0	0	0	1	0	0	1	0	1	0	0	0	0	0	2	2	0	1
157	63.04	F	9	0	85	1	6.67	6	28.57			1	0	1	1	1	1	0	1	0	1	0	0	0	0	0	1	1
158	59.76	F	15	0	85	0	8.33	7.67	41.33	1	0	0	0	0	0	0	0	0	0	0	0	0	0	0	1	1	2	2
159	43.54	F	9	1	80	1	2	1	25.71	1	0	0	0	1	1	1	0	0	0	0	1	0	0	0	0	0	0	2
160	47.72	F	11	0	80	1	3.33	0.67	37.39	1	0	0	0	1	0	0	0	0	0	0	0	0	0	0	0	0	0	1
161	29.62	F	19	0	90	1	6	5	31.8	1	1	1	0	1	1	1	0	0	0	0	1	0	0	1	0	0	0	1
162	76.52	F	4	1	85	0	2	1.33	29.48			0	0	0	0	0	0	0	0	0	0	0	0	0	1	1	1	2
163	37.69	M	19	1	90	1	8.67	7.33	30.6	0	0	1	0	0	1	1	0	0	0	0	1	1	0	0	0	0	0	1
164	50.51	M	11	0	80	0	2.33	0.67	27	1	1	0	0	0	1	0	0	0	0	0	0	0	0	0	0	0	0	1
165	36.86	F	18	0	90	1	8.33	2	31.65	1	1	0	0	0	1	0	1	0	1	0	0	0	0	0	0		0	1
166	33.96	M	10	1	90	0	4	1.67	28.36	0	0	0	1	0	0	0	0	0	0	0	0	0	0	0	0	0	0	1
167	45.08	F	3	0	80	1	1	1.33	31.95	0	0	1	0	1	1	1	0	0	0	0	1	0	0	1	0	0	1	1
168	35.01	M	13	1	90	1	6.67	5	28.77	1	0	0	0	0	0	1	1	0	1	0	1	0	0	0	2	2	0	1
169	22.54	M	17	0	90	0	4.67	4.33	26.45	0	1	0	0	1	1	0	0	0	0	0	0	0	0	0	0	0	0	1
170	56.51	F	18	1	90	1	8.33	9.33	27.43	1	1	1	1	1	0	1	0	0	0	0	1	0	0	0	1	1	0	1
171	62.86	M	20	0	90	1	8.67	7.67	23.83	0	0	0	0	1	1	1	0	0	0	0	1	0	0	0	1	1	1	2
172	54.38	M	20	0	85	1	6	6	27.43			0	0	1	1	1	0	0	0	0	1	0	0	1	2	2	1	1
173	48.8	F	14	1	95	1	8.67	10	27.46			1	0	1	1	1	1	0	1	0	1	0	0	0	1	0	1	2
174	64.14	F	11	0	90	0	3.33	3	39.06	0	0	0	0	0	0	0	0	0	0	0	0	0	0	0	2	2	1	1
175	39.53	M	16	1	100	1	4.33	5	43.2	1	0	1	1	1	1	1	1	1	1	1	1	0	0	0	1	0	0	1
176	31.32	F	0	0	90	1	4.67	3.67	41.12			0	0	1	1	0	1	0	1	0	0	0	0	0	0	0	2	1
177	67.74	F	13	0	95	1	4.67	4	41.74			0	1	1	1	1	1	0	1	0	1	0	0	0	2	2	0	1
178	71.31	F	16	1	95	1	7.67	6	27.53			0	0	1	1	1	1	1	1	0	1	1	0	0	2	2	1	1
179	20.58	F	11	0	80	0	6.67	4.67	28.75	0	0	0	0	0	0	0	0	0	0	0	0	0	0	0	2	2	0	1
180	73.5	M	16	1	90	1	4.67	5.33	27.88			0	0	1	1	1	1	0	1	1	1	0	0	1	0	0	1	1
181	43.12	M	17	0	95	1	4.33	6.67	26.75	0	1	1	0	1	1	1	1	0	1	0	1	0	0	0	0	0	0	1
182	56.47	F	17	0	90	0	5	1.67	41.34	0	0	0	0	0	0	0	0	0	0	0	0	0	0	0	1	0	1	2
183	44.72	M	4	0	80	0	5	0	23.18	0	0	0	0	0	0	0	0	0	0	0	0	0	0	0	1		0	1
184	66.46	F	6	0	85	1	0.33	4.33	34.34			1	0	0	1	1	1	0	1	0	1	0	0	1	1	1	1	1
185	64.78	F	8	1	95	1	7.33	6.33	28.6			0	0	1	0	1	1	0	0	1	1	0	0	0	0	0	0	1
186	44.73	M	7	1	85	1	3.67	3.67	24.87	0	0	0	0	1	1	1	0	0	0	0	1	0	0	1	0	0	1	1
187	52.03	F	20	0	90	1	8	7	30.17	0	0	0	0	1	0	1	1	0	1	0	1	0	0	0	2	2	0	1
188	76.81	F	6	1	90	1	5.67	10	29.43			1	1	1	1	0	0	0	0	0	0	0	0	0	2	0	1	1
189	51.74	M	14	1	100	1	6.67	5	27.78	0	0	1	1	1	0	1	0	0	0	0	1	0	0	0	2	2	1	1
190	54.92	F	9	1	80	1	4.67	6.67	23.44	1	1	1	1	0	0	1	0	0	0	0	1	0	0	0	2	2	0	1
191	24.08	F	19	1	95	1	7.33	6	44.92	1	0	1	1	1	1	1	1	0	1	0	1	1	0	1	2	0	0	1
192	54.9	F	14	1	90	1	9	9.67	27.58	1	0	1	1	0	1	1	0	0	0	0	1	0	0	0	0	0	0	1
193	54.45	F	11	0	80	1	4.33	6	27.75	0	0	1	0	1	1	1	0	0	0	0	1	0	0	0	0	0	1	1
194	62.24	M	3	0	90	1	4.67	4	22.27			0	0	1	1	0	1	0	1	0	0	0	0	0	2	0	0	1
195	67.57	M	19	0	85	0	7.33	7.33	38.7			0	1	0	1	0	0	0	0	0	0	0	0	0	2	2	1	1
196	33.14	M	11	1	90	1	3.67	4.33	20.38	1	0	1	1	1	1	1	1	0	1	0	1	0	0	0	2	2	0	1
197	44.07	F	4	1	85	0	4.33	4.67	38.1	0	0	0	0	1	1	0	1	0	1	0	0	0	0	0	2	2	0	1
198	39.31	F	6	1	80	0	3.33	2	27.39	1	0	0	0	1	1	0	1	0	1	0	0	0	0	0	2	2	0	1
199	25.02	M	18	1	85	0	5	4.33	20.96	0	1	0	0	1	0	1	0	0	0	0	1	0	0	0	0	0	0	1
200	25.74	F	9	0	80	1	5.67	3.67	27.71	1	0	0	0	0	1	1	0	0	0	0	1	0	0	0	2	0	0	1
201	46.77	F	9	0	80	1	8.67	9.33	35.34	0	0	1	0	1	0	1	1	0	1	1	0	0	1	0	0	0	0	1
202	55.36	F	15	1	100	1	9	9.33	23.34	1	1	1	1	1	1	1	0	0	0	0	1	0	0	0	0	0	0	1
203	31.16	M	18	1	95	1	5	7.33	22.15	1	0	1	0	1	1	1	1	0	0	1	0	0	0	1	0	0	0	1
204	58.6	M	13	1	80	1	6	5.67	27.12	0	0	0	1	1	0	1	0	0	0	0	1	0	0	1	0	0	1	1
205	39.36	M	15	1	95	1	8	6.67	27.42	0	0	1	0	0	1	1	1	0	1	0	1	0	0	0	2	2	0	1
206	54.3	F	0	0	80	0	8.33	4.67	26.22	0	0	0	0	1	0	0	0	0	0	0	0	0	0	0	2	1	0	1
207	26.68	F	8	0	95	0	4	2.67	21.03	0	0	0	0	1	0	0	0	0	0	0	0	0	0	0	1	1	1	1
208	32.68	F	3	0	85	1	3	4	25.34	0	0	0	0	0	0	1	0	0	0	0	1	0	0	1	0	0	0	1
209	64	F	18	1	90	1	2.33	10	25.65			1	0	1	1	1	1	0	1	0	1	0	0	0	0	2	0	2
210	52.25	M	12	1	90	1	3.67	3	25.44	1	1	0	0	1	1	1	1	0	0	1	1	0	0	0	0	0	0	1
211	31.9	F	22	0	95	1	6.33	7	30.48			0	0	1	1	1	1	0	1	1	1	1	1	0	2	2	0	1
212	51.09	F	6	0	100	1	1.33	1.67	42.09	0	0	0	0	1	1	0	0	0	0	0	0	0	0	0	0	0	2	2
213	50.08	M	5	1	90	0	3.33	2	21.55	1	1	0	0	0	0	0	1	0	0	1	0	0	0	0	0		0	1
214	30.86	F	3	0	80	0	3.67	2	23.66			0	0	0	0	0	0	0	0	0	0	0	0	0	0	0	0	1
215	30.05	F	8	0	90	0	2.67	1	21.47	0	0	0	0	0	1	0	0	0	0	0	0	0	0	0	2	0	0	1
216	40.4	F	16	0	80	1	5	2.33	36	0	1	0	1	1	0	0	0	0	0	0	0	0	0	0	1	1	2	1
217	49.14	F	13	1	80	0	6.67	4.33	38.29	0	0	0	0	0	0	0	0	0	0	0	0	0	0	0	2	2	0	1
218	59.79	M	22	1	85	1	8	7.67	37.4	0	0	1	1	0	1	0	1	0	1	1	0	0	0	0	0	0	1	1
219	26.4	F	12	0	90	1	6	4.67	25.39	1	0	0	1	1	1	1	1	0	1	0	1	0	0	0	0	0	0	1
220	60.85	F	12	0	90	0	5.67	7	27.2			1	0	0	1	0	0	0	0	0	0	0	0	0	2	2	0	1
221	29.97	M	12	1	80	1	4	3	19.02			1	1	0	1	1	0	0	0	0	1	0	0	0	0	2	0	1
222	43.79	F	7	1	90	0	5.33	6	27.92			1	0	0	0	0	0	0	0	0	0	0	0	0	2	2	0	1
223	29.89	M	14	1	100	1	4	7.67	33.36	0	0	1	1	1	1	1	1	0	1	0	1	1	0	0	1	1	0	1
224	54.84	M	2	1	80	1	0.33	2	26.08	0	0	1	0	0	0	1	1	0	1	1	1	1	0	0	2	2	0	1
225	73.6	F	10	0	90	1	2.67	5.67	25.39	0	0	1	0	1	1	1	1	1	1		1	0	0	0	1	1	2	1
226	45.43	F	22	0	80	1	5	4.33	29.24			0	0	1	1	1	1	0	1	0	1	0	0	0	0	0	0	2
227	43.45	F	5	0	90	0	3.33	4	39.23	0	0	1	0	0	1	0	0	0	0	0	0	0	0	0	2	2	0	1
228	46.76	F	21	1	100	1	6.67	7	36.72	1	1	1	1	1	1	1	1	1	0	1	1	0	0	1	0	1	0	1
229	73.89	F	18	0	90	1	5.33	3.67	31.36			1	0	1	1	1	0	0	0	0	1	0	0	1	2	0	2	2
230	64.42	M	4	0	95	1	1.67	2.33	23.9			1	0	0	1	1	1	0	1	0	1	0	0	0	0	0	2	2
231	63.83	M	11	1	90	1	9.33	10	35.48			1	0	1	1	1	0	0	0	0	1	0	0	0	1	1	0	1
232	49.42	M	22	0	95	0	7.33	6	28.44			0	1	0	0	0	0	0	0	0	0	0	0	0	0		0	1
233	54.84	M	17	1	80	1	6.33	6.67	45.98			1	1	1	1	0	0	0	0	0	0	0	0	0	1	1	2	1
234	39.61	F	8	0	90	1	7.33	6.67	30.29			0	1	1	1	1	0	0	0	0	1	0	0	1	2	0	0	1
235	46.01	F	7	1	80	1	3	5	23.84	0	0	1	0	0	1	0	0	0	0	0	0	0	0	0	0	0	0	1
236	56.08	F	8	0	85	1	8.67	6.33	34.6	1	1	1	0	1	1	1	0	0	0	0	1	0	0	1	0	1	1	1
237	31.57	M	22	1	90	1	7	7	22.14			1	1	0	0	1	0	0	0	0	1	0	0	0	2	2	0	1
238	67.67	F	9	1	80	1	4.67	4.67	25.56			0	0	0	1	1	0	0	0	0	1	1	0	0	0	0	1	1
239	24.32	F	17	0	90	1	10	10	33.75			0	0	1	1	0	1	0	1	0	0	0	0	0	2	2	0	2
240	49.36	F	14	0	90	1	5	1.33	32.41	1	1	0	0	0	1	1	0	0	0	0	1	0	0	0	2	2	0	1
241	27.71	F	12	0	85	0	6.33	5	19.73			1	0	1	1	1	0	0	0	0	1	0	0	0	2	2	0	1
242	52.99	F	18	0	90	1	8	4	44.34	1	1	0	0	1	0	1	0	0	0	0	0	0	1	0	0	0	0	1
243	53.52	F	14	0	80	1	6	5	36.33	0	1	0	1	1	1	1	1	1	1	0	1	0	0	0	2	2	1	1
244	76.4	F	20	1	80	1	7	9	21.29			1	0	1	1	1	1	1	1	0	1	0	0	0	0	0	1	1
245	50.27	M	8	1	85	1	2.67	2.33	37.67	0	1	0	0	1	1	1	1	1	0	1	0	0	1	0	2	1	1	2
246	63.16	M	13	1	90	1	2.67	2	40.11			1	0	1	1	1	1	0	1	1	1	0	0	0	0	0	2	1
247	59.73	M	7	1	100	1	5	6.67	28.71	0	0	1	1	1	1	1	0	0	0	0	1	1	0	0	1	1	0	1
248	75.27	M	11	1	95	1	5.67	5.67	34.55			1	0	1	1	0	1	1	1	0	0	0	0	0	2	2	2	1
249	38.62	F	15	1	85	1	8	6	25.52			0	0	1	1	1	0	0	0	0	1	0	0	0	0	0	0	2
250	79.27	F	17	1	85	1	7	7.67				0	0	0	0	1	1	0	1	0	1	0	0	0	2	2	1	2
251	59.23	F	9	1	90	1	3.67	3	20.87			1	0	1	1	1	1	1	0	0	1	0	0	1	0	0	1	1
252	22.32	M	15	0	80	1	5	3.67	26.87	1	1	0	1	0	0	1	0	0	0	0	1	1	0	0	0	0	0	1
253	71.2	F	11	0	80	1	0	9.33	35.31			1	0	0	1	1	1	1	0	0	0	0	1	0		1	0	2
254	48.89	F	14	0	90	1	6	3.67	37.99			0	0	1	1	1	1	0	1		1	0	0	0	2	0	1	3
255	56.57	F	8	1	80	0	4.33	5	31.89	0	0	0	0	0	1	0	1	0	0	1	0	0	0	0	2	2	0	1
256	80.56	F	14	0	80	1	4	3.67	27.3			0	0	0	1	1	0	0	0	0	1	0	0	0	0	0	1	1
257	66.45	M	15	1	90	1	8	5	30.73	0	0	1	1	0	1	1	0	0	0	0	1	0	0	1	1	1	0	1
258	57.82	M	14	1	100	1	3.67	4.33	32.15	1	1	1	0	1	1	1	1	1	1	1	0	0	1	0	1	0	0	1
259	29.68	M	16	1	100	1	5	4	34.12			0	0	1	1	1	1	1	1	0	1	0	0	0	0	0	0	1
260	63.83	F	12	1	90	1	5	7	23.2			1	1	1	1	1	1	1	1	1	0	0	1	1	0	0	1	1
261	74.14	M	16	1	90	1	2.67	6.67	36.84			1	0	1	1	1	1	1	1	0	1	0	0	1	1	1	2	2
262	58.29	M	7	0	80	1	5.33	2.33	30.02	0	0	0	0	1	0	1	1	0	1	0	1	0	1	0	0	2	0	1
263	25.78	F	14	1	100	0	5.33	3.67	30.86	0	0	0	0	0	0	0	0	0	0	0	0	0	0	0	2	1	0	1
264	68.25	M	14	1	95	1	8	8.67	37.37			1	0	1	1	0	1	0	0	1	0	0	0	0	2	2	0	1
265	45.94	M	18	1	90	0	6.67	5.67	22.16	0	0	0	0	1	0	0	0	0	0	0	0	0	0	0	0	0	0	1
266	58.8	F	14	1	95	1	8	7	32.63	1	1	0	0	1	1	1	1	1	1	0	1	0	1	0	0	0	1	1
267	59.51	M	16	1	90	0	5.33	5.67	23.39			1	0	0	1	0	0	0	0	0	0	0	0	0	2	0	0	1
268	63.72	F	19	0	90	1	4.33	5.33	32.49			1	0	0	0	1	1	1	1	0	0	0	1	0	2	2	0	2
269	37.56	M	9	0	90	1	2.67	1.67	27.08	1	1	0	0	1	1	1	1	0	1	0	1	0	0	0	2	1	0	1
270	60.63	F	19	1	85	1	6.33	7	38.37	0	0	0	0	1	1	0	1	0	1	1	0	0	0	0	1	2	0	1
271	37.91	M	15	0	100	0	3.33	0.67	26.26	0	0	0	0	0	0	0	0	0	0	0	0	0	0	0	2	0	0	1
272	57.49	F	13	1	100	1	3.67	6	34.37	0	1	0	0	1	0	1	1	0	1	0	1	0	0	0	2	1	0	1
273	54.86	M	11	0	95	0	5.33	2	28.83			0	0	1	0	0	1	0	0	1	0	0	0	0	0		0	1
274	42.99	F	4	0	95	0	1.67	1	24.23	0	0	0	0	1	1	0	0	0	0	0	0	0	0	0	1		0	1
275	44.38	M	17	1	95	1	6.67	8	25.96	0	0	0	0	1	1	0	1	0	1	1	0	0	0	0	1		0	2
276	69.75	F	21	1	85	1	3.67	8	31.23			0	0	1	1	0	1	0	1	1	0	0	0	0	1	0	1	1
277	81.97	F	14	0	90	1	5	5	20.3			1	0	1	1	1	1	0	0	1	0	0	0	1	2	2	0	2
278	37.61	M	21	0	90	0	8	5.33	41.21	0	0	0	0	0	1	0	0	0	0	0	0	0	0	0	2	2	1	2
279	58.02	F	19	0	90	1	6.67	6	42.91	0	0	0	0	1	1	1	1	0	1	0	1	0	0	1	2	2	1	1
280	62.33	F	13	0	85	1	7	7	38.19			0	0	1	1	0	0	0	0	0	0	0	0	0	2		1	1
281	36.93	F	4	0	80	1	5.67	3.33	22.96	0	0	1	0	0	1	1	1	0	1	0	1	0	0	1	0	2	0	1
282	52.21	M	7	0	95	1	5	4.33	21.78			0	0	1	1	0	1	1	1	1	0	0	0	0	1	0	2	1
283	52.38	M	13	1	95	1	7.67	6.67	25.97	0	1	1	1	1	1	1	1	0	1	0	1	0	0	0	2	2	1	1
284	57.26	F	4	0	85	0	4	4.33	33.12	0	0	0	0	0	1	0	1	0	1	0	0	0	0	0	0	0	0	1
285	39.01	M	9	1	85	1	4.67	4.67	23.81	0	0	0	0	1	0	0	1	0	0	1	0	0	0	0	0	0	0	1
286	81.03	M	10	1	95	0	5.67	6	30.72			1	0	0	0	0	0	0	0	0	0	0	0	0	2	2	2	1
287	47.36	M	3	1	90	0	2.67	2.67	27.25	0	0	0	0	0	0	0	0	0	0	0	0	0	0	0	1	1	1	2
288	24.85	F	7	0	90	1	4.67	3.33	22.67	0	0	1	0	1	1	1	1	0	1	1	1	0	0	0	1	1	0	1
289	58.15	F	15	1	90	1	6.33	5.33	25.58			1	1	1	1	1	1	1	0	1	1	0	0	0	0	0	1	2
290	62.5	F	5	1	80	1	1.67	5.33	36.95			1	0	1	0	1	1	0	1	0	1	0	0	0	1	2	1	1
291	47.97	M	19	0	80	1	5.67	7	34.25	0	0	1	1	1	0	1	1	0	1	0	1	0	0	0	2		1	1
292	48.02	M	12	1	100	1	3	2.67	29.17	0	0	1	1	1	1	1	1	1	1	1	1	1	0	0	1	1	2	1
293	56.16	M	10	1	95	1	3.33	3.67	33.59	0	0	1	1	1	1	1	1	0	0	1	1	0	0	1	1	1	0	1
294	26.12	M	1	1	80	0	4.33	3.67	27.75	0	0	0	0	1	0	0	0	0	0	0	0	0	0	0	2	2	1	1
295	63.13	M	8	0	90	1	3	2.33	30.89	0	0	1	0	1	0	1	1	0	1	0	1	0	1	0	1	1	0	1
296	58.67	F	23	1	90	1	7.33	9	43.1			1	0	1	1	1	1	0	1	0	1	0	0	0	2	2	1	2
297	47.49	M	11	1	100	1	6.33	5	32.88	0	0	1	1	0	1	1	1	0	1	0	1	0	0	1	1	1	1	1
298	36.78	F	2	0	90	0	6	2	23.4	0	0	0	0	1	0	0	0	0	0	0	0	0	0	0	2	2	0	1
299	47.98	M	6	0	85	0	3	2.67	25.35	0	0	1	0	0	0	1	0	0	0	0	1	0	0	0	2	2	0	1
300	46.51	F	21	0	100	0	7.33	6	25.79			0	0	1	0	0	0	0	0	0	0	0	0	0	2	0	0	1
301	39.5	F	8	0	85	0	4.33	3	21.48			0	0	1	1	0	0	0	0	0	0	0	0	0	2	2	0	1
302	47.02	F	18	1	80	1	5	3	26.22			0	1	1	0	1	1	1	1	0	1	0	1	0	2	2	0	1
303	43.62	M	11	1	100	1	3.33	4.33	22.31	0	0	1	0	1	1	1	1	0	1	1	1	0	0	0	0	2	0	1
304	36.17	F	14	0	90	1	4.67	4.33	25.7	0	0	1	0	0	1	1	0	0	0	0	1	0	0	1	2	2	0	1
305	49.31	M	17	0	90	0	8	8	24.55			0	0	0	0	0	1	0	1	0	0	0	0	0	2		2	2
306	36.34	M	16	0	90	1	4.67	2.67	35.15	1	1	0	1	1	1	1	1	1	0	0	1	0	0	0	0	0	0	2
307	75.16	M	9	1	90	1	4.67	4.33	29.75			1	1	0	1	1	1	0	0	1	0	0	0	1	2	2	1	1
308	70.95	F	5	0	95	0	1.33	1	29.09			1	0	0	0	0	0	0	0	0	0	0	0	0	0	0	0	1
309	76.67	M	2	1	80	0	3.67	1	26.64			0	1	1	0	0	0	0	0	0	0	0	0	0	1	0	0	1
310	63.09	M	21	1	95	1	8.67	8	24.29			1	0	1	1	1	0	0	0	0	1	0	0	0	2	2	2	2
311	22.6	F	18	0	80	1	8	8	25.47		1	0	1	1	1	1	0	0	0	0	1	0	0	1	2	2	0	1
312	42.52	F	12	1	90	1	3.67	3.67	24.82	0	0	1	0	1	1	0	1	0	1	0	0	0	0	0	0	0	0	1
313	58.11	F	16	0	100	0	4.33	2.33	30.86			0	0	0	0	0	0	0	0	0	0	0	0	0	1	2	1	1
314	54.78	M	8	0	80	1	1.67	7.33	24.22	0	0	1	0	0	1	0	1	0	1	0	0	0	0	0	1	1	1	1
315	57.92	F	10	1	100	1	5.33	4.67	30.26			0	0	1	1	1	0	0	0	0	1	0	0	0	2	2	0	1
316	45.11	F	12	1	80	1	2.67	2.67	46.99	1	1	0	0	0	0	1	1	0	1	0	1	0	0	0	1	0	1	1
317	40.33	F	9	1	85	1	3	2.33	33.72	0	0	0	1	1	1	1	1	0	0	1	1	0	1	1	0	0	0	1
318	74	F	6	0	100	0	2.67	3.33	20.76			1	0	0	0	0	0	0	0	0	0	0	0	0	2	2	2	2
319	69.02	F	7	0	95	0	4	4	29.39	0	0	0	1	1	1	1	0	0	0	0	1	0	0	1	2	2	1	1
320	26.32	M	22	1	95	1	6	7	37.55			1	1	0	1	1	1	1	0	1	1	0	0	0	2	2	0	2
321	50.9	M	7	1	90	1	4.5	4.33	24.84			1	0	1	1	1	1	0	1	1	1	0	0	0	2	1	1	1
322	62.46	F	17	1	90	0	9.67	7.67	31.87			0	1	1	1	0	1	0	1	0	0	0	0	0	0	0	0	2
323	26.61	F	17	1	95	1	8.67	10	28.24			1	1	1	1	1	0	0	0	0	1	0	0	0	1	0	0	1
324	49.55	M	6	0	100	1	3.33	5	31.74	0	0	1	0	1	1	1	1	0	1	0	1	0	0	0	1	1	0	1
325	54	F	8	1	100	1	1.33	0.67	30.09	0	0	0	0	1	1	0	1	0	1	1	0	0	0	0	2	1	1	2
326	41.49	M	22	1	85	1	9.67	10	19.93			1	0	0	1	1	1	0	0	1	1	0	0	0	0	0	0	1
327	51.75	M	21	1	95	1	5.67	9	30.43	0	1	1	1	1	1	1	1	0	1	1	1	0	0	0	1	1	1	1
328	60.45	F	9	0	100	0	4.33	4	28.59	1	1	0	0	0	0	0	0	0	0	0	0	0	0	0	0	0	0	1
329	69.97	M	3	1	90	1	1.67	2.33	27.3			1	0	1	1	1	0	0	0	0	1	0	0	1	0	0	2	1
330	66.63	F	15	0	100	1	2.5	5	28.14			1	0	1	1	1	1	1	1	0	1	0	0	1	1	2	0	1
331	66.77	M	4	1	95	1	6.33	7.33	34.31			0	0	0	1	1	1	0	0	1	1	0	1	0	2	1	0	1
332	42.59	F	11	0	95	0	5.67	5.67	29.42	1	1	0	0	0	0	0	0	0	0	0	0	0	0	0	2	2	0	1
333	28.24	F	20	0	90	1	9	8	24.69	0	0	0	0	1	1	1	1	1	1	0	1	0	0	1	2	0	0	1
334	58.05	M	21	1	85	1	7.67	7.33	24.81			0	1	1	1	1	1	0	1	0	1	0	0	0	2	2	1	3
335	28.7	F	13	1	80	0	6.33	0	24.64			0	0	1	1	0	0	0	0	0	0	0	0	0	2	2	0	1
336	60.41	F	14	1	90	1	6.67	5.33	32.27			0	0	0	0	1	1	0	1	1	1	0	1	1	2	2	0	1
337	42.85	F	18	1	80	1	6	6	34.45	0	0	0	0	0	1	0	1	0	1	0	0	0	0	0	0	1	0	1
338	60.84	F	20	0	80	0	9	4.67	42.26			0	0	1	0	1	1	0	1	0	1	0	0	0		2	2	3
339	41.72	F	12	0	95	1	5	6.33	22.11	0	0	1	1	1	0	1	0	0	0	0	1	0	0	0	2	2	1	1
340	43.97	F	12	1	100	1	9	8.67	20.48	0	0	1	1	1	1	1	1	0	1	0	1	0	0	1	1	1	0	1
341	61.29	F	14	1	80	1	9	9.33	38.83			1	1	0	0	1	0	0	0	0	1	0	0	0	2	2	0	1
342	61.27	F	17	1	85	1	5.33	5.67	34.98			1	0	1	1	0	1	0	1	1	0	0	0	0	2	2	0	2
343	43.69	M	6	1	80	1	2.67	2	31.05	0	0	0	0	0	1	0	0	0	0	0	0	0	0	0	2	1	0	1
344	44.71	M	18	1	100	1	4.33	6.33	23.59	0	0	1	1	0	1	1	0	0	0	0	1	0	0	1	1	1	0	1
345	53.19	M	14	1	95	1	6	6.33	34.16	0	0	1	1	1	1	1	0	0	0	0	1	0	1	1	0	0	0	1
346	45.59	F	10	1	90	1	3.33	7	22.43	0	0	1	0	1	1	1	1	0	1	0	1	0	0	0	1	1	0	1
347	25.52	F	19	1	90	1	5.67	6.67	29.76	0	0	1	1	1	1	1	1	0	1	1	1	0	0	0	0	0	0	1
348	59.72	M	3	1	85	1	1	1.67	26.42	0	0	0	0	1	1	0	1	1	0	0	0	0	0	0	0	0	0	1
349	49.9	M	2	1	100	0	2.67	4.67	28.43			0	0	0	0	0	0	0	0	0	0	0	0	0	2	0	2	2
350	57.03	F	22	1	80	1	7.67	8.67	32.01	1	1	1	1	0	1	0	1	0	0	1	0	0	0	0	0	1	2	3
351	59.46	F	14	0	80	0	6	7	25.77	0	0	1	0	0	0	0	0	0	0	0	0	0	0	0	2	2	0	1
352	60.68	F	12	0	90	0	7.67	5	34.75	1	1	0	0	1	0	0	0	0	0	0	0	0	0	0	1	0	2	2
353	50.02	M	11	1	95	1	1.67	2	27.92	0	0	1	0	0	1	1	1	1	1	0	1	0	0	1	1	1	0	1
354	65.86	F	9	0	100	0	5	3.33	27.29			0	0	0	0	0	0	0	0	0	0	0	0	0	2	2	1	1
355	41.39	M	23	0	80	1	5	6	28.72			1	0	1	1	1	1	0	1	0	1	0	0	1	2	2	1	2
356	53.11	M	0	1	95	1	5.67	10	26.06			1	0	1	1	0	1	0	1	1	0	0	0	0	2	1	1	1
357	40.15	M	19	1	100	1	5	5	27.93	1	0	1	1	1	1	1	1	1	0	1	1	0	0	0	2	2	0	2
358	26.27	F	6	1	90	1	5.33	5.33	20.11	1	1	0	0	0	1	1	1	1	1	0	1	0	0	1	2	2	0	1
359	53.16	M	8	1	80	0	1.67	1.33	38.52	0	0	0	0	0	0	0	1	0	1	0	0	0	0	0	0	2	1	2
360	50.81	F	20	1	90	1	8.33	9.33	24.65			0	0	1	1	1	1	1	1	0	1	0	0	0	2	2	0	1
361	42.51	F	17	1	95	1	8.5	8	22.16	0	0	1	1	1	1	1	0	0	0	0	1	0	0	1	0	0	0	1
362	66.6	M	22	1	80	1	6.33	10	30.08			1	0	1	1	1	0	0	0	0	0	0	0	1	2	2	2	3
363	54.81	M	19	0	95	1	5.67	9	46.99	1	1	1	0	0	1	1	0	0	0	0	1	0	0	0	1	1	2	2
364	63.78	F	0	1	80	1	9.33	5.67	30.51			0	0	0	0	0	1	0	0	1	0	0	0	0	2	0	2	3
365	50.38	F	4	0	85	1	5.33	6	22.03	0	0	1	0	1	1	0	0	0	0	0	0	0	0	0	2	2	0	1
366	43.27	M	15	1	95	1	6.67	6	21.77	0	0	1	0	1	1	1	1	0	1	1	1	0	0	0	1	1	0	1
367	72.35	M	10	1	85	1	6.33	6	27.75			1	0	0	1	1	0	0	0	0	1	0	0	0	1	1	0	1
368	46.95	F	19	0	95	0	7.33	5.67	40.78	1	1	0	0	0	0	0	0	0	0	0	0	0	0	0	2	0	2	1
369	43.26	F	10	1	90	1	1.33	4	21.29	0	0	1	0	1	0	1	0	0	0	0	1	0	0	0	1	1	0	1
370	41.25	F	5	0	85	0	5	1	30.2	0	0	1	0	0	0	0	1	0	1	0	0	0	0	0	2	2	0	1
371	72.29	M	19	1	100	1	7	4	27.55	0	0	0	0	1	1	0	1	1	1	1	0	0	0	0	2		1	1
372	53.18	F	12	1	90	1	5.67	6.33	35.59	0	0	1	0	1	1	1	1	0	1	0	1	0	1	0	2	2	0	1
373	53.57	F	16	1	80	1	4.33	7	27.91	1	1	1	1	1	1	0	1	0	1	1	0	0	0	0	1		0	1
374	56.02	M	14	1	85	1	5.67	5.67	34.76	1	1	1	0	0	1	0	1	1	1	1	0	0	0	0	0	0	1	1
375	41.08	F	22	0	85	1	8.33	8.33	66.69			0	0	1	1	0	0	0	0	0	0	0	0	0	2	2	1	1
376	42.48	F	13	0	90	0	7.67	2	29.07	0	0	0	0	1	0	0	0	0	0	0	0	0	0	0	2	2	1	1
377	21.08	F	18	0	90	1	10	9	18.74			0	0	1	1	1	1	0	1	0	1	0	0	1	0	0	1	1
378	68.32	F	3	1	85	1	6.33	6	22.75			0	0	1	1	0	1	0	1		0	0	0	0	2	2	1	1
379	51.25	F	20	1	80	1	9	5.67	32.94	0	0	0	0	0	0	1	1	0	1	0	1	0	0	1	0	0	0	1
380	41.85	M	2	0	80	1	6.67	6.67	29.14	0	1	0	0	0	1	0	1	0	1	0	0	0	0	0	1	1	0	1
381	60.08	M	6	1	95	1	5.67	6.67	29.07	0	0	1	0	0	0	0	1	1	1	0	0	0	0	0	2	2	0	1
382	76.43	F	9	0	100	0	5.67	5.67	26.75			0	0	0	0	0	0	0	0	0	0	0	0	0	2	2	1	1
383	46.88	F	14	1	100	0	4	1.67	30.82	1	0	0	0	1	0	0	0	0	0	0	0	0	0	0	1	1	0	1
384	42.42	F	15	1	100	1	4.33	5	23.73	0	0	1	0	0	1	0	0	0	0	0	0	0	0	0	2	0	0	2
385	57.71	F	18	1	95	1	6.33	7.33	26.03	0	1	1	0	0	1	1	0	0	0	0	1	0	0	0	1	1	0	1
386	49.38	M	19	1	85	1	6	7.67	25.33	1	1	0	0	0	1	0	1	1	0	0	0	0	0	0	0	0	1	1
387	70.62	M	9	1	90	1	2.33	1.67	27.92			1	0	0	0	1	0	0	0	0	1	0	0	0	2	0	2	1
388	48.53	F	11	1	100	1	7.67	7.67	21.33	0	0	1	1	1	1	1	0	0	0	0	1	0	0	0	2	1	0	1
389	49.53	F	4	1	100	1	5.67	1.67	30.41	0	0	0	0	0	1	1	1	0	1	1	1	0	0	1	0	0	0	1
390	43.26	F	13	1	90	1	7	7.67	20.39			1	1	1	1	1	0	0	0	0	1	1	0	0	2	2	0	1
391	28.99	F	22	1	80	0	5.33	4	29.02	1	1	0	0	0	0	1	0	0	0	0	1	0	0	0	0	0	0	1
392	48.36	M	10	0	80	1	7	6.33	38.49	0	0	1	1	0	0	1	1	0	1	0	0	0	1	0	2	2	1	1
393	27.27	F	16	0	80	1	2	2.33	27.58			0	1	0	1	1	1	0	1	0	1	0	0	0	1	0	0	1
394	53.2	F	14	0	95	1	5.33	6	31.65	0	1	0	1	1	1	0	1	1	1	1	0	0	0	0	0	1	1	1
395	28.13	F	23	1	100	1	10	10	47.42	0	0	0	0	1	1	1	1	0	1	0	1	0	0	0	2	2	0	2

## Sheet: variable descriptions
age	Age (years)at the time of assessment		Scale
gender	Gender	F=female; M=male	Nominal
RMDQ	RMDQ Sciatica total score (0-23)		Scale
BMI	BMI continuous		Scale
self_certified	Self-certified time off work because of current bout/episode of back and/or leg pain	1= yes, 0=no	Nominal
sick_note	Given Sick/Fit Notes from doctor because of current bout/episode of back/leg pain	1= yes, 0=no	Nominal
SLR positive	Positive SLR right or left	1, positive; 0, negative.	Nominal
Crossover SLR	Crossover SLR	1, positive; 0, negative.	Nominal
Femoral nerve stretch Positive	Femoral stretch	1, positive; 0, negative.	Nominal
Slump Positive	Slump	1, positive; 0, negative.	Nominal
Sensory deficit	Sensory deficit	1= yes, 0=no	Nominal
Reflex deficit	Reflex deficit	1= yes, 0=no	Nominal
Myotome deficit	Myotome	1= yes, 0=no	Nominal
Subjective Sensory changes	Subjective Sensory changes	1= yes, 0=no	Nominal
below knee pain	Below knee pain R or L	1= yes, 0=no	Nominal
Leg pain worse	Leg pain worse?	1= yes, 0=no	Nominal
Positive cough sneeze	Cough/ Sneeze / Strain:	1, positive; 0, negative.	Nominal
Neural Tension	IF Slump Positive OR Fem stretch Positive OR SLR positive	1, positive; 0, negative.	Nominal
Neurological deficit	Any neurological deficit	1= yes, 0=no	Nominal
Confidence in diagnosis (0-100%)	Level of confidence in clinical impression: 100=absolutely certain/confident		Scale				v
leg pain intensity			Scale
back pain intensity			Scale
backpain duration	Duration(weeks/months) of having current bout/episode of backpai	0: Less than 6 weeks, 1: 6 to 12 weeks, 2: >12 weeks	Nominal
legpain duration	Duration(weeks/months) of the most recent bout/episode of leg pain)	0: Less than 6 weeks, 1: 6 to 12 weeks, 2: >12 weeks	Nominal
Nerve root compression on MRI	Nerve root compression on MRI	1= yes, 0=no	Nominal
Comorbidities	The comorbidity health problems included chest problems, heart problems, raised blood pressure, diabetes, circulation problems in the legs	0=none; 1= one; 2= two or more	Nominal
General health	How is your general health?	1=good; 2=fair;3=poor	Nominal
Clinician diagnosis sciatica	Clinician diagnosis sciatica	1=sciatica; 0=referred leg pain	Nominal
